Extending non-targeted exposure discovery of environmental chemical exposures during pregnancy and their association with pregnancy complications—a cross-sectional study

Jessica Trowbridge<sup>1</sup>, Dimitri Abrahamsson<sup>1</sup>, Ting Jiang<sup>2</sup>, Miaomiao Wang<sup>2</sup>, June-Soo Park<sup>2</sup>, Rachel Morello-Frosch<sup>3</sup>, Marina Sirota<sup>4</sup>, Dana E. Goin<sup>1</sup>, Marya Zlatnick<sup>1</sup> and Tracey J. Woodruff<sup>1</sup>

<sup>1</sup>Department of Obstetrics, Gynecology and Reproductive Sciences, Program on Reproductive Health and the Environment, University of California San Francisco, San Francisco 94143 California

<sup>2</sup>Department of Toxic Substances Control, Environmental Chemistry Laboratory, California Environmental Protection Agency, Berkeley 94710, California

<sup>3</sup>Department of Environmental Science and Policy Management and School of Public Health, University of California, Berkeley, Berkeley 94720 California

<sup>4</sup>Bakar Computational Health Sciences Institute and Department of Pediatrics, University of California San Francisco, San Francisco 94158, California

\*Corresponding author: Tracey J. Woodruff, [tracey.woodruff@ucsf.edu](mailto:tracey.woodruff@ucsf.edu)

## Abstract

**Background:** Non-targeted Analysis (NTA) methods identify novel exposures; however, few chemicals have been quantified and interrogated with pregnancy complications.

**Objectives:** We characterize levels of nine exogenous and endogenous chemicals in maternal and cord blood identified, selected, and confirmed in prior NTA steps including: linear and branched isomers perfluorooctane sulfonate (PFOS); perfluorohexane sulfonate (PFHxS); monoethylhexyl phthalate; 4-nitrophenol; tetraethylene glycol; tridecanedioic acid, octadecanedioic acid; and deoxycholic acid. We evaluate relationships between maternal and cord levels and the relationship gestational diabetes mellitus (GDM) and hypertensive disorders of pregnancy in a diverse pregnancy cohort in San Francisco.

**Methods:** We collected matched maternal and cord serum samples from 302 pregnant people at delivery from the Chemicals in Our Bodies cohort in San Francisco. Chemicals were identified via NTA and quantified using targeted approaches. We calculate distributions and Spearman correlation coefficients testing the relationship of chemicals within and between the maternal and cord blood matrices. We used logistic regression to calculate the odds of GDM and hypertensive disorders of pregnancy associated with an interquartile range increase in maternal chemical exposures.

**Results:** We detected linear PFOS, PFHxS, octadecanedioic acid, and deoxycholic acid in at least 97% of maternal samples. Correlations ranged between -0.1 and 0.9. We observed strong correlations between cord and maternal levels of PFHxS (coefficient = 0.9), linear PFOS (0.8), and branched PFOS (0.8). An IQR increase in linear PFOS, branched PFOS, and octadecanedioic acid is associated with increased odds of GDM [OR (95%CI): 1.43 (0.96, 2.14), 1.56 (1.00, 2.44), and 1.26 (0.83, 1.92) respectively] and tridecanedioic acid positively associated with hypertensive disorders of pregnancy [1.28 (0.90, 1.86 )].

**Discussion:** We identified both exogenous and endogenous chemicals, two of which (octadecanedioic acid and tridecanedioic acid) have both endogenous and exogenous sources, and which have seldom been quantified in pregnant people or related to pregnancy complications.

**Keywords:** Non-targeted analysis, linear and branched PFOS, tridecanedioic acid, fatty acids, gestational diabetes mellitus, pregnancy hypertension

## 1 1. Introduction

2 Prenatal exposures to environmental chemicals are ubiquitous in the United States (U.S.)<sup>1</sup> and  
3 studies have demonstrated they can have lifelong consequences for maternal and child health outcomes,<sup>2</sup>  
4 such as neurodevelopment, cardiovascular disease, and reproduction. However, fewer than 1% of over  
5 80,000 chemicals produced and used in the U.S. are regularly biomonitored<sup>3</sup> and fewer still have been  
6 assessed for adverse health outcomes during pregnancy. Non-targeted analysis (NTA) coupled with a  
7 prioritization step and quantification using targeted methods can facilitate the identification and  
8 quantitation of previously unmeasured chemical exposures.<sup>4</sup> Additionally, by identifying and measuring  
9 novel chemical exposures we can investigate their relationship with pregnancy complications,  
10 facilitating the identification of opportunities for prevention.

11 Increasingly, studies are applying NTA to better characterize exposure to toxic environmental  
12 chemicals seldom measured in pregnant people.<sup>5,6</sup> NTA studies in pregnant and non-pregnant  
13 populations have identified both known and novel chemical exposures, including PFAS congeners,  
14 pesticides, flame retardants, and other industrial chemicals, which have been linked with pregnancy  
15 complications.<sup>6,7</sup> For example, PFAS has been linked with increased risk of miscarriage and  
16 preeclampsia,<sup>8</sup> and chemicals with fatty acid-like structures, including PFAS and other long-chain  
17 hydrocarbons, have been shown to interact with endogenous fatty acid metabolism impacting placental  
18 development and may contribute to pregnancy complications and adverse birth outcomes.<sup>6,9-11</sup> Similarly,  
19 NTA studies have been able to link novel chemical exposures and metabolism biomarkers.<sup>6,12</sup> However,  
20 the vast majority of novel chemicals identified through NTA have not been evaluated for associations  
21 with pregnancy related complications.

22 This study builds on previous NTA work done on the Chemicals in Our Bodies-2 (CIOB2)  
23 cohort, in which we first identified chemical features using high resolution mass spectrometry (HRMS)

24 and confirmed chemical identities via comparison to a standard.<sup>5,6,13</sup> The aim of the present study is to  
25 describe the quantification of a subset of chemicals identified and prioritized through this prior NTA and  
26 to evaluate relationships between chemical levels and pregnancy complications. Supplementing the non-  
27 targeted discovery of chemicals with targeted quantification described in this analysis addresses some of  
28 the limitations of NTA; namely, targeted approaches increase the sensitivity to measure and compare  
29 chemical concentrations and facilitate assessment of relationships between chemicals and pregnancy  
30 complications.

## 31 2. Methods

### 32 2.1 Data and Sample Collection

33 We enrolled pregnant participants in the CIOB2 cohort between 2014 and 2018 from the prenatal  
34 clinics at the Zuckerberg San Francisco General Hospital (SFGH) and Mission Bay or Moffit Long  
35 (MB/ML) hospitals. Participant recruitment and sample collection is described elsewhere.<sup>4,5,14</sup> Briefly,  
36 participants were recruited during the second trimester of pregnancy, with eligibility criteria including  
37 18-40 years of age, English or Spanish speaking, with singleton pregnancies, and no diagnosed  
38 pregnancy complications at recruitment. Paired maternal and umbilical cord blood were collected from  
39 participants who agreed to bank their samples and be contacted for participation in future studies.  
40 Maternal samples were collected at delivery and cord blood was collected after delivery but before  
41 clamping whenever possible. Blood was collected in BD Vacutainer Plus serum tubes, spun at 3000 rpm  
42 to collect the serum, and stored at -80°C until analysis. Study protocols were approved by the  
43 Institutional Review Boards at the University of California, San Francisco and Berkeley (# 13-12160).

44 Demographic information was collected via interviews conducted during the second trimester of  
45 pregnancy and included maternal age, race and ethnicity (white, Latinx, and Non-Hispanic Asian/Pacific  
46 Islander, other race—due to low numbers of Black, Native American, and multiracial participants, these

47 groups were collapsed into “other” for model specification), maternal education (some college or less,  
48 completed a college degree, >college degree), household income (<40k per year, 40 to 100k, >100k),  
49 nativity (born in the U.S. yes or no). Pre-pregnancy body mass index (BMI kg/m<sup>2</sup>; <18.5, 18.5 to <25,  
50 25 to <35, >=35)<sup>15</sup> and hospital of delivery [Zuckerberg San Francisco General Hospital (SFGH) or  
51 Mission Bay/ Moffit Long (MB/ML)] were abstracted from the medical record.

52 Pregnancy complications were identified by clinical diagnoses and abstracted from the medical  
53 record. These included the binary outcomes of: gestational diabetes mellitus (GDM), preeclampsia, and  
54 gestational hypertension. Preeclampsia and pregnancy related hypertension were combined into one  
55 outcome called hypertensive disorder of pregnancy because they make up part of a larger spectrum of  
56 pregnancy complications related to hypertension.<sup>16,17</sup>

57

## 58 2.2 Chemical selection

59 Nine environmental chemicals were measured in maternal and cord samples using targeted  
60 approaches described below. Linear and branched isomers of perfluorooctane sulfonate (PFOS);  
61 perfluorohexane sulfonate (PFHxS); monoethylhexyl phthalate (MEHP), a metabolite of diethylhexyl  
62 phthalate, a common plasticizer<sup>18</sup>; 4-nitrophenol, a known endocrine disruptor used in pesticides, dyes,  
63 and pharmaceuticals<sup>19</sup>; tetraethylene glycol, a plasticizer and solvent used in metal lubricants, printing  
64 inks, and cosmetics;<sup>20</sup> tridecanedioic acid and octadecanedioic acid which are endogenous fatty acids  
65 that also have exogenous sources primarily from plastics synthesis;<sup>21–23</sup> and deoxycholic acid, a bile acid  
66 and endogenous biomarker associated with GDM (**Table 1**).<sup>24</sup>

67 The selection and confirmation procedures for selection of these chemicals is described  
68 elsewhere.<sup>5,6,13</sup> Briefly, in previous NTA studies, 30 matched maternal and cord samples were scanned  
69 using HRMS in positive and negative ionization modes identifying suspect features. Detected features

70 were matched to an in-house database and features were then prioritized for MS/MS fragmentation  
71 based on the ubiquity of exposure, feature intensity differences across demographic variables, and  
72 correlation between maternal and cord samples. Fifteen chemicals were confirmed at level 1 confidence  
73 via comparison to analytical standards.<sup>28</sup> Level 1 confirmed features included monoethylhexyl phthalate,  
74 4-nitrophenol, tridecanedioic acid, and octadecanedioic acid. Subsequent generalized suspect screening  
75 analysis of this cohort was expanded to include 295 matched maternal and cord samples and a more  
76 comprehensive database including both endogenous and exogenous compounds. This resulted in  
77 nineteen chemicals confirmed with analytical standards to level 1 confidence, including those previously  
78 identified, and adding PFHxS, PFOS, and deoxycholic acid which were tentatively identified through  
79 MS/MS fragmentation (confidence level 2). We selected chemicals for targeted quantification if the  
80 chemical was identified in previous NTA with level 1 or level 2 confidence, is a widely used industrial  
81 compound with high potential for exposure, is associated with pregnancy complications, or is not  
82 regularly biomonitoring by the Center for Disease Control or other large biomonitoring studies.<sup>5</sup>

83

### 84 2.3 Targeted chemical analysis

85 Quantitation analysis of the nine selected chemicals was carried out using Agilent MassHunter  
86 Quantitative Analysis software package (Agilent Technologies Inc., Version 10.0). Analytical grade  
87 standards were purchased from suppliers (Sigma Aldrich and Thermo Fisher) and serial dilutions of the  
88 standards were prepared in methanol. Calibration curve of each of the specific standard was acquired  
89 under the same condition as serum sample analysis, using the LC/QTOF-MS (Agilent 1290 UPLC  
90 interfaced with Agilent iFunnel 6550 QTOF-MS system) as described previously.<sup>5,6,13</sup> M2-PFOA  
91 (Wellington Laboratories, Ontario, Canada) was used as internal standard for negative ionization  
92 chemicals, while D15-TPP (Cambridge Isotope Laboratories, Tewksbury, MA) for positive ionization

93 chemicals. Particularly, PFOS in serum samples were separated chromatically, thus both total and linear  
94 PFOS quantitation were calculated, and branched PFOS concentrations were obtained by subtracting  
95 linear portion from the total PFOS.

96

## 97 2.4 Statistical analysis

98 To address chemical levels below the limit of detection we used machine reported values when  
99 available or, if not available, we imputed levels below the LOD with  $LOD/\sqrt{2}$ . We assessed the  
100 detection frequency (percent above the limit of detection) and limited our statistical analysis to  
101 chemicals with a detection frequency of 67% or higher. We described the distribution of chemicals in  
102 maternal and cord blood samples, and calculated Spearman correlation coefficients for chemicals within  
103 and between maternal and cord samples. We natural log-transformed the data for use in statistical  
104 models and applied logistic regression models to assess the relationship between maternal chemical  
105 exposure and pregnancy complications. Potential confounders were identified *a priori* (**Supplemental**  
106 **Figure 1**), and our final models were adjusted for maternal age, hospital of delivery, and race/ethnicity.  
107 We considered hospital of delivery as a cumulative indicator of socioeconomic status (including income,  
108 educational attainment, and insurance status). Patients in both hospitals are racially and ethnically  
109 diverse. However, SFGH is a safety net hospital that serves a large proportion of patients without  
110 private health insurance, while MB/ML serves patients of higher socioeconomic status and with private  
111 health insurance. Race and ethnicity are included in models as an indicator of the exposure to structural  
112 racism, that is independently associated with chemical exposure and adverse pregnancy complications.  
113 We calculated the interquartile range (IQR) of each natural log transformed chemical. Beta coefficients  
114 and 95% confidence intervals (CI) were multiplied IQR and exponentiated to identify the odds ratio  
115 (OR) of each pregnancy complication for each IQR increase in exposure level.

## 116 3. Results

### 117 Participants, demographics, and medical record data

118 The analysis included 302 participants (**Table 2**). The average age at delivery was 33 years of  
119 age. Forty-three percent of participants identified as white and 32% as Latinx or Hispanic. Most  
120 participants completed college or graduate degrees (>65%), were born in the U.S. (54%), and had a  
121 household income of over \$100,000 per year (56%). For the outcomes, 21% of participants had a  
122 diagnosis of GDM, 13% gestational hypertension, and 7% preeclampsia.

123

### 124 3.1 Distribution and correlation of chemical levels in maternal samples

125 Participants had at least four chemicals in maternal samples and three chemicals in cord samples.  
126 PFHxS, linear PFOS, deoxycholic acid, and octadecanedioic acid were all detected in at least 97% of  
127 maternal samples. Deoxycholic acid, tridecanedioic acid, PFHxS, were detected in at least 87% of cord  
128 blood samples (Table 3). Since we estimated branched PFOS levels by subtracting linear PFOS from the  
129 total PFOS we did not calculate a detection frequency for this chemical. Chemical detection frequency  
130 varied between maternal and cord blood samples. Linear PFOS, and 4-nitrophenol were detected more  
131 often maternal samples while monoethylhexyl phthalate, and tridecanedioic acid were detected more  
132 frequently in cord blood. Similarly, the average chemical levels varied across the different matrices with  
133 branched PFOS, linear PFOS, deoxycholic acid, and octadecanedioic acid found at higher levels in  
134 maternal samples compared to cord samples, while tridecanedioic acid was higher in cord than in  
135 maternal samples.

136 Monoethylhexyl phthalate, tetraethylene glycol, and 4-nitrophenol were each detected in fewer  
137 than 50% of maternal samples, however 4-nitrophenol was detected in more maternal serum samples  
138 than cord samples, while monoethylhexyl phthalate was found in more cord blood samples. Due to their



139 low detection frequency, monoethylhexyl phthalate, tetraethylene glycol, and 4-nitrophenol, were  
140 excluded from further analyses.

141 When assessing the Spearman correlation coefficients (**Figure 2**) of the same chemical across  
142 maternal and cord samples, we found that linear PFOS, and branched PFOS and PFHxS were highly  
143 correlated in the maternal and cord samples (correlation coefficients of 0.8, 0.8, and 0.9 respectively).  
144 When looking at the correlations of different chemicals in the maternal and cord samples we found  
145 moderate correlations between cord-linear PFOS and maternal-branched PFOS, as well as between cord-  
146 linear PFOS and maternal-PFHxS (coefficients 0.7 and 0.5 respectively). In the cord blood samples,  
147 linear PFOS was highly correlated with branched PFOS and moderately with PFHxS (coefficients of 0.8  
148 to 0.6 respectively), and octadecanedioic acid was moderately correlated with tridecanedioic acid  
149 (coefficient of 0.4). In the maternal samples, the relationship between linear and branched PFOS had a  
150 correlation coefficient of 0.8, branched PFOS and PFHxS a correlation of 0.6, and between linear PFOS  
151 and PFHxS of 0.6. The PFAS chemicals were weakly correlated with the fatty acids—octadecanedioic  
152 acid, tridecanedioic acid—and neither PFAS, nor the fatty acids were correlated with deoxycholic acid,  
153 within or between the maternal serum and cord blood samples.

154  
155 3.2 Association between chemical exposure with pregnancy complications

156 From our logistic models we observed a trend of increased odds of GDM for each IQR increase in levels  
157 of exposure to environmental chemicals and increased odds of pregnancy hypertensive disorders with  
158 tridecanedioic acid (Table 4). For the relationship between chemical exposures and GDM, all the  
159 chemicals included in this analysis had an OR above 1. Stronger associations were observed for  
160 branched PFOS, linear PFOS, and octadecanedioic acid; The unadjusted relationship between linear  
161 PFOS and branched PFOS with GDM was statistically significant. The direction and measures of

162 association we observed between chemical levels and hypertensive disorders of pregnancy was less  
163 consistent than for GDM. Exposure to tridecanedioic acid was associated with an increase in the odds of  
164 hypertensive disorders of pregnancy [OR (95%CI): 1.28(0.90, 1.86)]. Exposure to tridecanedioic acid  
165 was also associated in increased odds of the individual outcomes that made up hypertensive disorders of  
166 pregnancy—preeclampsia and gestational hypertension (**Supplemental Table 1**). The ORs for PFHxS,  
167 octadecanedioic acid, and deoxycholic acid with gestational hypertension approximated 1. Linear and  
168 branched PFOS had an OR of <1 but the confidence intervals included the null value.

#### 169 4. Discussion

170 Building on NTA steps from prior studies<sup>4,6,13</sup>, we confirmed and quantified the presence of nine  
171 chemicals, some of which have not been previously measured in pregnant people, such as tridecanedioic  
172 acid, octadecanedioic acid, and tetraethylene glycol, or rarely measured in pregnant people like 4-  
173 nitrophenol. In addition, a subset of these were moderately to strongly associated with GDM and  
174 hypertensive disorders of pregnancy. Linear and Branched PFOS were associated with increased odds of  
175 GDM and tridecanedioic acid was associated with hypertensive disorders of pregnancy. This study adds  
176 to our understanding of the associations between environmental exposures during pregnancy and  
177 pregnancy complications.

178 This study provides further evidence of prenatal exposure to environmental chemicals, some of  
179 which have positive associations with pregnancy complications. A 2020 study suggests that PFAS  
180 exposure during pregnancy may also affect metabolic pathways that adversely impact placental  
181 development<sup>9</sup> and while evidence remains mixed, PFAS has been shown to be associated with  
182 hypertensive disorders of pregnancy, preeclampsia, and GDM.<sup>9,29-31</sup> The linear and branched forms of  
183 PFOS have not previously been well characterized during pregnancy. Furthermore, metabolism,

184 excretion, and placental transfer may vary by the linear and branched forms of this ubiquitous chemical  
185 and lead to different health outcomes and pregnancy complications.<sup>25</sup>

186 Significant positive correlations between branched PFOS, linear PFOS and PFHxS in the  
187 maternal and cord samples suggest that they may share a common source of exposure. Indeed,  
188 traditional PFOS production yielded a mixture of branched and linear isomers with approximately 30%  
189 of isomers in the branched form.<sup>25</sup> From linear models we found that the linear and branched forms of  
190 PFOS may have a relationship with pregnancy complications. Branched and Linear PFOS were  
191 significantly associated with GDM in unadjusted models and although the relationship was attenuated in  
192 adjusted models, the direction and magnitude of the association were maintained. Scientific evidence  
193 indicates transplacental transfer of PFAS chemicals<sup>6,32,33</sup> and gestational diabetes may facilitate  
194 transplacental transfer of PFOS.<sup>34</sup> Linear PFOS makes up a larger proportion of the measured PFOS,<sup>25</sup> is  
195 hypothesized to remain longer in maternal serum and is therefore more available in maternal samples  
196 than branched PFOS, which may contribute to the differences in association we observed with  
197 GDM.<sup>35,36</sup>

198 Previous studies have found that increased exposure to fatty acids may be associated with an  
199 increased risk of hypertensive disorders of pregnancy due to disruption of fatty acid regulation and  
200 metabolism.<sup>37</sup> We saw an association between tridecanedioic acid and hypertensive disorders of  
201 pregnancy, but not for octadecanedioic acid. Similarly, although the bile acid, deoxycholic acid, is  
202 associated GDM in other studies,<sup>24</sup> we did not see elevated risk of these pregnancy complications  
203 associated with deoxycholic acid in our study. The endogenous chemicals in our study have seldom been  
204 studied in pregnant women and the fatty acids are also known to have exogenous sources and uses.

205 Tetraethylene glycol, 4-nitrophenol and monoethylhexyl phthalate were present in a small subset  
206 of our participants but were not evaluated for an association with pregnancy complications because their

207 detection frequency in maternal samples was below 65%. In addition, these chemicals have short half-  
208 lives and are quickly metabolized and excreted in urine contributing to their low detection frequency in  
209 serum samples.<sup>19,26,38</sup> These are high production volume chemicals that may interact with endocrine and  
210 metabolic pathways; however, their relationship with adverse reproductive or pregnancy outcomes has  
211 not been previously assessed, warranting further study. Despite their low detection frequency and that  
212 they were measured in serum rather than in urine our study demonstrates that novel exposures to these  
213 environmental chemicals can still be identified through non-targeted methods and confirmed through  
214 targeted approaches.

215         There are several limitations that may influence the associations we observed in our study. First  
216 is the timing of the collection of samples and assessment of health outcomes. This is a cross-sectional  
217 study with samples collected at delivery and pregnancy complications were identified from clinical  
218 diagnosis abstracted from medical record. Because of this we cannot assess temporality of our exposures  
219 and outcome. Nevertheless, the chemicals included in this study are industrial chemicals, many of which  
220 are high production volume chemicals that have a high potential for exposure. For example, PFAS  
221 chemicals are ubiquitous in biological matrices and the environment, and tridecanedioic acid and  
222 octadecanedioic acid are used in the synthesis of plastics and are considered high production volume  
223 chemicals.<sup>21</sup> While the chemical measurements reflect a snapshot of an individual's exposure history  
224 during pregnancy the sources and uses of these environmental chemicals imply that there is a potential  
225 for prolonged exposure throughout the pregnancy. Studies show that PFAS levels decrease in later  
226 trimesters of pregnancy,<sup>39,40</sup> thus the PFAS levels we measured at delivery may be lower than in other  
227 trimesters of pregnancy biasing our results toward to the null. Another potential limitation is that levels  
228 of branched PFOS were estimated and not quantified with a standard and thus the levels of branched  
229 PFOS may reduce precision of calculated measures of association. Likewise, the low detection

230 frequency of 4-nitrophenol, tetraethylene glycol, or monoethylhexyl phthalate precluded our ability to  
231 assess the chemical-outcome relationship. However, these chemicals remain understudied in pregnant  
232 people and are of high concern due to their widespread use as industrial chemicals and limited  
233 understanding of their health effects. Finally, because our recruitment criteria indicated that participants  
234 with pregnancy complications by the second trimester we may have missed earlier manifestations of  
235 pregnancy complications. This could undercount the number of GDM and hypertensive disorders of  
236 pregnancy biasing our results toward the null. However, diagnosis of hypertensive disorders of  
237 pregnancy and testing for GDM usually occurs in the third trimester of pregnancy while our participants  
238 were recruited in the second.<sup>41,42</sup>

239 In this analysis we identified and quantified exogenous and endogenous environmental  
240 chemicals, some of which have not been previously measured during pregnancy nor evaluated for  
241 associations with pregnancy complications. Our study supports prior reports of associations between the  
242 branched and linear forms of PFOS and GDM and adds to the limited research on exposure to  
243 tridecanedioic acid and octadecanedioic acid, endogenous fatty acids that also have industrial sources.  
244 Finally, this study further illustrates the benefit of pairing non-targeted and targeted approaches to  
245 identify, confirm, and quantify novel chemical exposures. Combining NTA methods with targeted  
246 chemicals measurement can be further applied to identifying, quantifying, and evaluating metabolism  
247 biomarkers that are on the pathway between exposure and downstream adverse health effects.

## 5. References

- 1 Woodruff TJ, Zota AR, Schwartz JM. Environmental chemicals in pregnant women in the United States: NHANES 2003-2004. *Environ Health Perspect* 2011; **119**: 878–885.
- 2 American College of Obstetricians and Gynecologists' Committee on Obstetric Practice. Reducing Prenatal Exposure to Toxic Environmental Agents: ACOG Committee Opinion, Number 832. *Obstet Gynecol* 2021; **138**: e40–e54.
- 3 CDC. National Report on Human Exposure to Environmental Chemicals | CDC. Center for Disease Control and Prevention. 2019. <https://www.cdc.gov/exposurereport/index.html> (accessed 18 Nov2018).
- 4 Wang A, Gerona RR, Schwartz JM, Lin T, Sirota M, Morello-Frosch R *et al.* A Suspect Screening Method for Characterizing Multiple Chemical Exposures among a Demographically Diverse Population of Pregnant Women in San Francisco. *Environ Health Perspect* 2018; **126**: 077009.
- 5 Wang A, Abrahamsson DP, Jiang T, Wang M, Morello-Frosch R, Park J-S *et al.* Suspect Screening, Prioritization, and Confirmation of Environmental Chemicals in Maternal-Newborn Pairs from San Francisco. *Environ Sci Technol* 2021; **55**: 5037–5049.
- 6 Panagopoulos Abrahamsson D, Wang A, Jiang T, Wang M, Siddharth A, Morello-Frosch R *et al.* A Comprehensive Non-targeted Analysis Study of the Prenatal Exposome. *Environ Sci Technol* 2021; **55**: 10542–10557.
- 7 Grashow R, Bessonneau V, Gerona RR, Wang A, Trowbridge J, Lin T *et al.* Integrating Exposure Knowledge and Serum Suspect Screening as a New Approach to Biomonitoring: An Application in Firefighters and Office Workers. *Environ Sci Technol* 2020; **54**: 4344–4355.
- 8 Gao X, Ni W, Zhu S, Wu Y, Cui Y, Ma J *et al.* Per- and polyfluoroalkyl substances exposure during pregnancy and adverse pregnancy and birth outcomes: A systematic review and meta-analysis. *Environ Res* 2021; **201**: 111632.
- 9 Szilagyi JT, Avula V, Fry RC. Perfluoroalkyl Substances (PFAS) and Their Effects on the Placenta, Pregnancy, and Child Development: a Potential Mechanistic Role for Placental Peroxisome Proliferator-Activated Receptors (PPARs). *Curr Environ Health Rep* 2020; **7**: 222–230.
- 10 Ledda C, Fiore M, Santarelli L, Bracci M, Mascali G, D'Agati MG *et al.* Gestational Hypertension and Organophosphorus Pesticide Exposure: A Cross-Sectional Study. *Biomed Res Int* 2015; **2015**: 280891.
- 11 Kahn LG, Trasande L. Environmental Toxicant Exposure and Hypertensive Disorders of Pregnancy: Recent Findings. *Curr Hypertens Rep* 2018; **20**: 87.
- 12 Bessonneau V, Gerona RR, Trowbridge J, Grashow R, Lin T, Buren H *et al.* Gaussian graphical modeling of the serum exposome and metabolome reveals interactions between environmental chemicals and endogenous metabolites. *Sci Rep* 2021; **11**: 7607.

- 13 Jiang T, Wang M, Wang A, Abrahamsson D, Kuang W, Morello-Frosch R *et al.* Large-Scale Implementation and Flaw Investigation of Human Serum Suspect Screening Analysis for Industrial Chemicals. *J Am Soc Mass Spectrom* 2021; **32**: 2425–2435.
- 14 Eick SM, Hom Thepaksorn EK, Izano MA, Cushing LJ, Wang Y, Smith SC *et al.* Associations between prenatal maternal exposure to per- and polyfluoroalkyl substances (PFAS) and polybrominated diphenyl ethers (PBDEs) and birth outcomes among pregnant women in San Francisco. *Environ Health* 2020; **19**: 100.
- 15 CDC. Defining Adult Overweight and Obesity. Centers for Disease Control and Prevention. 2021. <https://www.cdc.gov/obesity/adult/defining.html> (accessed 12 Feb2022).
- 16 Pinheiro TV, Brunetto S, Ramos JGL, Bernardi JR, Goldani MZ. Hypertensive disorders during pregnancy and health outcomes in the offspring: a systematic review. *J Dev Orig Health Dis* 2016; **7**: 391–407.
- 17 Folk DM. Hypertensive Disorders of Pregnancy: Overview and Current Recommendations. *J Midwifery Womens Health* 2018; **63**: 289–300.
- 18 Martínez-Razo LD, Martínez-Ibarra A, Vázquez-Martínez ER, Cerbón M. The impact of Di-(2-ethylhexyl) Phthalate and Mono(2-ethylhexyl) Phthalate in placental development, function, and pathophysiology. *Environ Int* 2021; **146**: 106228.
- 19 Li R, Song M, Li Z, Li Y, Watanabe G, Nagaoka K *et al.* 4-Nitrophenol exposure alters the AhR signaling pathway and related gene expression in the rat liver. *Journal of Applied Toxicology* 2017; **37**: 150–158.
- 20 Final report on the safety assessment of Triethylene Glycol and PEG-4. *Int J Toxicol* 2006; **25 Suppl 2**: 121–138.
- 21 Tridecanedioic acid - Chemical Details. <https://comptox.epa.gov/dashboard/chemical/details/DTXSID9021683> (accessed 24 Dec2021).
- 22 Cui X, Yan D, Xiao D. Synthesis and characterization of novel polyamides based on tridecanedioic acid: Nylons 3 13, 5 13, 6 13, 7 13, 9 13, 10 13, 11 13. *e-Polymers* 2004; **4**. doi:10.1515/epoly.2004.4.1.784.
- 23 PubChem. Octadecanedioic acid. <https://pubchem.ncbi.nlm.nih.gov/compound/70095> (accessed 1 Mar2022).
- 24 Liu J, Li J, Li S, Leng J, Li W, Yang W *et al.* Circulating Lysophosphatidylcholines in Early Pregnancy and Risk of Gestational Diabetes in Chinese Women. *J Clin Endocrinol Metab* 2020; **105**: dga058.
- 25 Schulz K, Silva MR, Klaper R. Distribution and effects of branched versus linear isomers of PFOA, PFOS, and PFHxS: A review of recent literature. *Science of The Total Environment* 2020; **733**: 139186.



- 26 Koch HM, Bolt HM, Preuss R, Angerer J. New metabolites of di(2-ethylhexyl)phthalate (DEHP) in human urine and serum after single oral doses of deuterium-labelled DEHP. *Arch Toxicol* 2005; **79**: 367–376.
- 27 Jaacks LM, Diao N, Calafat AM, Ospina M, Mazumdar M, Ibne Hasan MOS *et al.* Association of prenatal pesticide exposures with adverse pregnancy outcomes and stunting in rural Bangladesh. *Environ Int* 2019; **133**: 105243.
- 28 Schymanski EL, Jeon J, Gulde R, Fenner K, Ruff M, Singer HP *et al.* Identifying small molecules via high resolution mass spectrometry: communicating confidence. *Environ Sci Technol* 2014; **48**: 2097–2098.
- 29 C8 Science Panel. C8 Science Panel Website. 2019.<http://www.c8sciencepanel.org/> (accessed 30 Jul2019).
- 30 Liu X, Zhang L, Chen L, Li J, Wang Y, Wang J *et al.* Structure-based investigation on the association between perfluoroalkyl acids exposure and both gestational diabetes mellitus and glucose homeostasis in pregnant women. *Environment International* 2019; **127**: 85–93.
- 31 Gao Y, Chen L, Wang C, Zhou Y, Wang Y, Zhang Y *et al.* Exposure to polybrominated diphenyl ethers and female reproductive function: A study in the production area of Shandong, China. *Sci Total Environ* 2016; **572**: 9–15.
- 32 Li A, Zhuang T, Shi W, Liang Y, Liao C, Song M *et al.* Serum concentration of bisphenol analogues in pregnant women in China. *Sci Total Environ* 2020; **707**: 136100.
- 33 Blake BE, Fenton SE. Early life exposure to per- and polyfluoroalkyl substances (PFAS) and latent health outcomes: A review including the placenta as a target tissue and possible driver of peri- and postnatal effects. *Toxicology* 2020; **443**: 152565.
- 34 Eryasa B, Grandjean P, Nielsen F, Valvi D, Zmirou-Navier D, Sunderland E *et al.* Physico-chemical properties and gestational diabetes predict transplacental transfer and partitioning of perfluoroalkyl substances. *Environment International* 2019; **130**: 104874.
- 35 Beeson S, Martin JW. Isomer-Specific Binding Affinity of Perfluorooctanesulfonate (PFOS) and Perfluorooctanoate (PFOA) to Serum Proteins. *Environ Sci Technol* 2015; **49**: 5722–5731.
- 36 Watkins DJ, Vélez-Vega CM, Rosario Z, Cordero JF, Alshawabkeh AN, Meeker JD. Preliminary assessment of exposure to persistent organic pollutants among pregnant women in Puerto Rico. *International Journal of Hygiene and Environmental Health* 2019; **222**: 327–331.
- 37 Varga T, Czimmerer Z, Nagy L. PPARs are a unique set of fatty acid regulated transcription factors controlling both lipid metabolism and inflammation. *Biochimica et Biophysica Acta (BBA) - Molecular Basis of Disease* 2011; **1812**: 1007–1022.
- 38 Fowles J, Banton M, Klapacz J, Shen H. A toxicological review of the ethylene glycol series: Commonalities and differences in toxicity and modes of action. *Toxicol Lett* 2017; **278**: 66–83.



- 39 Jain RB. Effect of Pregnancy on The Levels of Selected Perfluoroalkyl Compounds for Females Aged 17–39 Years: Data From National Health and Nutrition Examination Survey 2003–2008. *Journal of Toxicology and Environmental Health, Part A* 2013; **76**: 409–421.
- 40 Fisher M, Arbuckle TE, Liang CL, LeBlanc A, Gaudreau E, Foster WG *et al.* Concentrations of persistent organic pollutants in maternal and cord blood from the maternal-infant research on environmental chemicals (MIREC) cohort study. *Environmental Health* 2016; **15**: 59.
- 41 Ohkuchi A, Hirashima C, Takahashi K, Suzuki H, Matsubara S. Prediction and prevention of hypertensive disorders of pregnancy. *Hypertens Res* 2017; **40**: 5–14.
- 42 Rodriguez BSQ, Mahdy H. *Gestational Diabetes*. StatPearls Publishing, 2021 <https://www.ncbi.nlm.nih.gov/books/NBK545196/> (accessed 2 Mar2022).

## 6. Tables

Table 1. Chemical uses and sources of the nine chemicals identified from non-targeted analyses (NTA) and selected for confirmation and quantification

| Name                                             | Sources and Uses                                                                                                                                                                                              |
|--------------------------------------------------|---------------------------------------------------------------------------------------------------------------------------------------------------------------------------------------------------------------|
| <b>Branched perfluorooctane sulfonate (PFOS)</b> | Industrial Chemicals used for stain, water, and fire resistance. In fabrics and food packaging. <sup>25</sup>                                                                                                 |
| <b>Linear PFOS</b>                               |                                                                                                                                                                                                               |
| <b>Perfluorohexane sulfonate (PFHxS)</b>         |                                                                                                                                                                                                               |
| <b>Deoxycholic acid</b>                          | A naturally occurring bile acid and endogenous biomarkers.                                                                                                                                                    |
| <b>Tridecanedioic acid</b>                       | Endogenous fatty acid, also used in plastic and resin manufacturing. <sup>21,22</sup>                                                                                                                         |
| <b>Octadecanedioic acid</b>                      | Endogenous fatty acid also used in plastic and resin manufacturing. <sup>23</sup> CDR database and estimates use for 3 companies at <1,000,000 lbs/year each.                                                 |
| <b>Monoethylhexyl phthalate (MEHP)</b>           | Secondary diethylhexyl phthalate (DEHP) metabolite. DEHP is a common plasticizer. Studies suggest that secondary oxidized metabolites, not DEHP metabolites, are the developmental toxicants <sup>18,26</sup> |
| <b>Tetraethylene glycol (TEG)</b>                | Industrial solvent used in cosmetics, fragrances, manufacturing, food contact, industrial fluids, lubricants. <sup>20</sup> . CDR from 11 companies each reporting 10,000 -50,000 pounds per year             |
| <b>4-nitrophenol</b>                             | Xenobiotic metabolite of the pesticides parathion and methyl parathion, 4-nitroanisole. <sup>19,27</sup>                                                                                                      |

Chemical Data Reporting (CDR) a USEPA program where companies/manufacturers report quantities of chemicals being used and imported. Tetraethylene Glycol and octadecanedioic acid were the only ones found on the CDR database. [Basic Information about Chemical Data Reporting | US EPA](#)

Table 2. Demographic variables and outcomes in Chemicals in Our Bodies 2 participants (n= 302) recruited between 2014 and 2018 in San Francisco

|                                                        | Mean(SD) or N(%) |
|--------------------------------------------------------|------------------|
| <b>COVARIATES</b>                                      |                  |
| <b>Maternal age at delivery (years)</b>                | 33 (±5)          |
| <b>Race/ethnicity</b>                                  |                  |
| White                                                  | 130 (43%)        |
| Latinx                                                 | 96 (32%)         |
| Asian                                                  | 47 (16%)         |
| Other or Unknown <sup>a</sup>                          | 29 (10%)         |
| <b>Education</b>                                       |                  |
| Some college or less                                   | 94 (31%)         |
| College degree                                         | 73 (24%)         |
| Graduate degree                                        | 125 (41%)        |
| Missing                                                | 10 (3%)          |
| <b>Household income</b>                                |                  |
| <40k                                                   | 62 (21%)         |
| 40k-100k                                               | 36 (12%)         |
| >100k                                                  | 170 (56%)        |
| Missing                                                | 34 (11%)         |
| <b>Born in U.S.</b>                                    |                  |
| No                                                     | 110 (36%)        |
| Yes                                                    | 147 (49%)        |
| Missing                                                | 45 (15%)         |
| <b>Pre-pregnancy BMI<sup>b</sup></b>                   |                  |
| <18.5                                                  | 6 (2%)           |
| 18.5 to <25                                            | 147 (49%)        |
| 25 to <30                                              | 73 (24%)         |
| 30 or higher                                           | 41 (14%)         |
| Missing                                                | 35 (12%)         |
| <b>Hospital of Delivery</b>                            |                  |
| San Francisco General Hospital                         | 88 (29%)         |
| Mission Bay                                            | 213 (71%)        |
| Missing                                                | 1 (<1%)          |
| <b>OUTCOMES</b>                                        |                  |
| <b>Gestational diabetes mellitus</b>                   |                  |
| No                                                     | 237 (78%)        |
| Yes                                                    | 63 (21%)         |
| Missing                                                | 2 (1%)           |
| <b>Preeclampsia</b>                                    |                  |
| No                                                     | 268 (89%)        |
| Yes                                                    | 20 (7%)          |
| Missing                                                | 14 (5%)          |
| <b>Gestational hypertension</b>                        |                  |
| No                                                     | 248 (82%)        |
| Yes                                                    | 39 (13%)         |
| Missing                                                | 15 (5%)          |
| <b>Hypertensive disorders of pregnancy<sup>c</sup></b> |                  |
| None                                                   | 238 (79%)        |
| Any                                                    | 50 (17%)         |
| Missing                                                | 14 (5%)          |

<sup>a</sup>Race and ethnicity categories were collapsed for use in linear models due to small numbers in some categories. Other/unknown includes Black, Native Hawaiian or Pacific Islander, Native American, multiracial and individuals of unknown race; <sup>b</sup> BMI is calculated as kg/m<sup>2</sup> and cut-offs are based on the CDC guidelines;<sup>15</sup>

<sup>c</sup> Combines preeclampsia and gestational hypertension.

Table 3. Distribution of chemical levels in maternal serum (n= 302) and cord blood<sup>a</sup> (n= 299) (ng/ml)

| Chemical                                                       | LOD  | DF% | GM   | GSD  | min  | max   | Percentile |      |      |       |
|----------------------------------------------------------------|------|-----|------|------|------|-------|------------|------|------|-------|
|                                                                |      |     |      |      |      |       | 25         | 50   | 75   | 95    |
| <b>Branched PFOS<sup>b</sup></b> (Ratio GM cord/maternal: 0.7) |      |     |      |      |      |       |            |      |      |       |
| cord                                                           | NR   | NR  | 0.2  | 2.4  | 0    | 1.3   | 0.1        | 0.2  | 0.3  | 0.6   |
| mat                                                            | NR   | NR  | 0.3  | 2    | 0    | 3     | 0.2        | 0.3  | 0.5  | 1     |
| <b>Linear PFOS</b> (Ratio: 0.5)                                |      |     |      |      |      |       |            |      |      |       |
| cord                                                           | 0.43 | 67  | 0.6  | 1.6  | <LOD | 3.8   | <LOD       | 0.5  | 0.8  | 1.4   |
| mat                                                            | 0.43 | 97  | 1.1  | 1.8  | <LOD | 6.7   | 0.7        | 1    | 1.6  | 3.1   |
| <b>PFHxS</b> (Ratio: 0.8)                                      |      |     |      |      |      |       |            |      |      |       |
| cord                                                           | 0.11 | 98  | 0.3  | 1.6  | <LOD | 2.6   | 0.2        | 0.3  | 0.4  | 0.7   |
| mat                                                            | 0.11 | 100 | 0.4  | 1.8  | <LOD | 4.2   | 0.3        | 0.4  | 0.5  | 1.1   |
| <b>Tridecanedioic acid</b> (Ratio: 1.5)                        |      |     |      |      |      |       |            |      |      |       |
| cord                                                           | 6.79 | 86  | 11.2 | 1.6  | <LOD | 47.7  | 8.1        | 11.2 | 14.9 | 23.7  |
| mat                                                            | 6.79 | 67  | 7.7  | 1.5  | <LOD | 26.2  | 6.3        | 8.1  | 9.9  | 14    |
| <b>Octadecanedioic acid</b> (Ratio: 0.2)                       |      |     |      |      |      |       |            |      |      |       |
| cord                                                           | 0.48 | 100 | 3.1  | 1.8  | 0.5  | 35.7  | 2.2        | 3    | 4.3  | 9.2   |
| mat                                                            | 0.48 | 100 | 13.6 | 2    | 1.9  | 102.8 | 8.6        | 13.6 | 21.8 | 40.3  |
| <b>Deoxycholic acid</b> (Ratio: 0.2)                           |      |     |      |      |      |       |            |      |      |       |
| cord                                                           | 0.81 | 99  | 3.7  | 2.2  | <LOD | 54.4  | 2.2        | 3.2  | 5.7  | 15.3  |
| mat                                                            | 0.81 | 99  | 16.1 | 3.4  | <LOD | 432.6 | 7.5        | 16.5 | 37.1 | 104.8 |
| <b>Monoethylhexyl phthalate</b> (Ratio: 1.3)                   |      |     |      |      |      |       |            |      |      |       |
| cord                                                           | 5.19 | 58  | 6.7  | 2.7  | <LOD | 136.1 | <LOD       | 6    | 10.7 | 50.4  |
| mat                                                            | 5.19 | 44  | <LOD | <LOD | <LOD | 452.6 | <LOD       | <LOD | 16   | 60.2  |
| <b>Tetraethylene glycol</b> (Ratio: 1.0)                       |      |     |      |      |      |       |            |      |      |       |
| cord                                                           | 2.1  | 43  | 3    | 3.1  | <LOD | 358   | <LOD       | <LOD | 4.7  | 35.3  |
| mat                                                            | 2.1  | 43  | 2.9  | 2.9  | <LOD | 226.2 | <LOD       | <LOD | 5    | 24.3  |
| <b>4-nitrophenol</b> (Ratio: 0.8)                              |      |     |      |      |      |       |            |      |      |       |
| cord                                                           | 0.67 | 17  | <LOD | 1.5  | <LOD | 1.6   | <LOD       | <LOD | <LOD | 0.9   |
| mat                                                            | 0.67 | 27  | <LOD | 1.6  | <LOD | 2.5   | <LOD       | <LOD | 0.7  | 1     |

Abbreviations: GM geometric mean, GSD geometric standard deviation, LOD limit of detection, DF detection frequency, NR not reportable. <sup>a</sup>N is smaller for cord blood samples because we were not able to collect cord blood from a small number of participants. <sup>b</sup>The LOD and DF for branched PFOS were not reportable because they were estimated by subtracting the levels of linear PFOS from the total PFOS. Ratio illustrates transfer efficiency between maternal and cord samples and was calculated by GM(Cord)/GM(Mat)

Table 4. Adjusted and unadjusted odds ratios and 95% confidence intervals from linear models of the relationship between an interquartile range (IQR) chemical exposure at delivery and pregnancy complications (n = 302)

| Chemical                    | OR (95% CI)          |                                     |
|-----------------------------|----------------------|-------------------------------------|
|                             | gestational diabetes | hypertensive disorders <sup>b</sup> |
| Number missing              | 2                    | 14                                  |
| N(%) with outcome           | 63 (21%)             | 50 (17%)                            |
| <b>Branched PFOS</b>        |                      |                                     |
| Model0                      | 1.65 ( 1.10 , 2.52 ) | 1.05 ( 0.68 , 1.62 )                |
| Model1                      | 1.56 ( 1.00 , 2.46 ) | 1.06 ( 0.65 , 1.71 )                |
| <b>Linear PFOS</b>          |                      |                                     |
| Model0                      | 1.50 ( 1.05 , 2.17 ) | 0.85 ( 0.56 , 1.27 )                |
| Model1                      | 1.43 ( 0.96 , 2.14 ) | 0.89 ( 0.56 , 1.39 )                |
| <b>PFHxS</b>                |                      |                                     |
| Model0                      | 1.15 ( 0.86 , 1.51 ) | 1.00 ( 0.72 , 1.35 )                |
| Model1                      | 1.09 ( 0.80 , 1.48 ) | 0.98 ( 0.67 , 1.38 )                |
| <b>Octadecanedioic acid</b> |                      |                                     |
| Model0                      | 1.20 ( 0.82 , 1.77 ) | 1.05 ( 0.69 , 1.63 )                |
| Model1                      | 1.26 ( 0.83 , 1.92 ) | 1.00 ( 0.65 , 1.54 )                |
| <b>Tridecanedioic acid</b>  |                      |                                     |
| Model0                      | 1.08 ( 0.79 , 1.49 ) | 1.25 ( 0.88 , 1.80 )                |
| Model1                      | 1.03 ( 0.74 , 1.45 ) | 1.28 ( 0.90 , 1.86 )                |
| <b>Deoxycholic acid</b>     |                      |                                     |
| Model0                      | 1.16 ( 0.81 , 1.69 ) | 0.96 ( 0.65 , 1.43 )                |
| Model1                      | 1.17 ( 0.80 , 1.72 ) | 0.97 ( 0.65 , 1.45 )                |

<sup>a</sup> CI = Confidence Interval; Model0 is the unadjusted model; Model1 is adjusted for maternal age, hospital of delivery, and race/ethnicity; <sup>b</sup> includes both preeclampsia and gestational hypertension

## 7. Figures

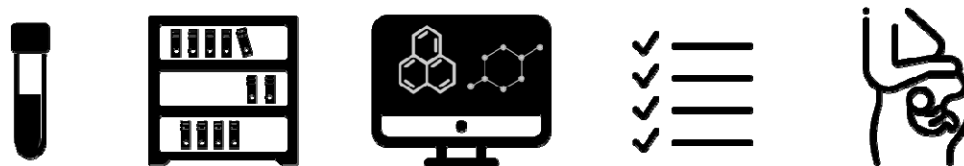

| Study                         | HRMS                       | Database match                            | Feature selection from <i>a priori</i> criteria      | Confirmed with analytical standard | Selected for quantification                                                                                                                               |
|-------------------------------|----------------------------|-------------------------------------------|------------------------------------------------------|------------------------------------|-----------------------------------------------------------------------------------------------------------------------------------------------------------|
| Wang <i>et al</i> 2020        | 17,512 ESI+<br>17219 ESI-  | 557 unique compounds                      | 73 from MS/MS spectra                                | 15                                 | <u>Level 1</u><br>PFHxS,<br>PFOS,<br>Octadecanedioic acid,<br>Tridecanedioic acid,<br>4-nitrophenol,<br>Monoethylhexyl phthalate,<br>Tetraethylene glycol |
| Abrahamsson <i>et al</i> 2021 | 712 features ESI+ and ESI- | 543 exogenous<br>142 endogenous compounds | 73 from MS/MS spectra<br>98 via annotation algorithm | 19                                 | <u>Level 2</u><br>Deoxychoic Acid                                                                                                                         |

Figure 1. Summary of NTA procedures leading to the selection of nine chemical for quantification.

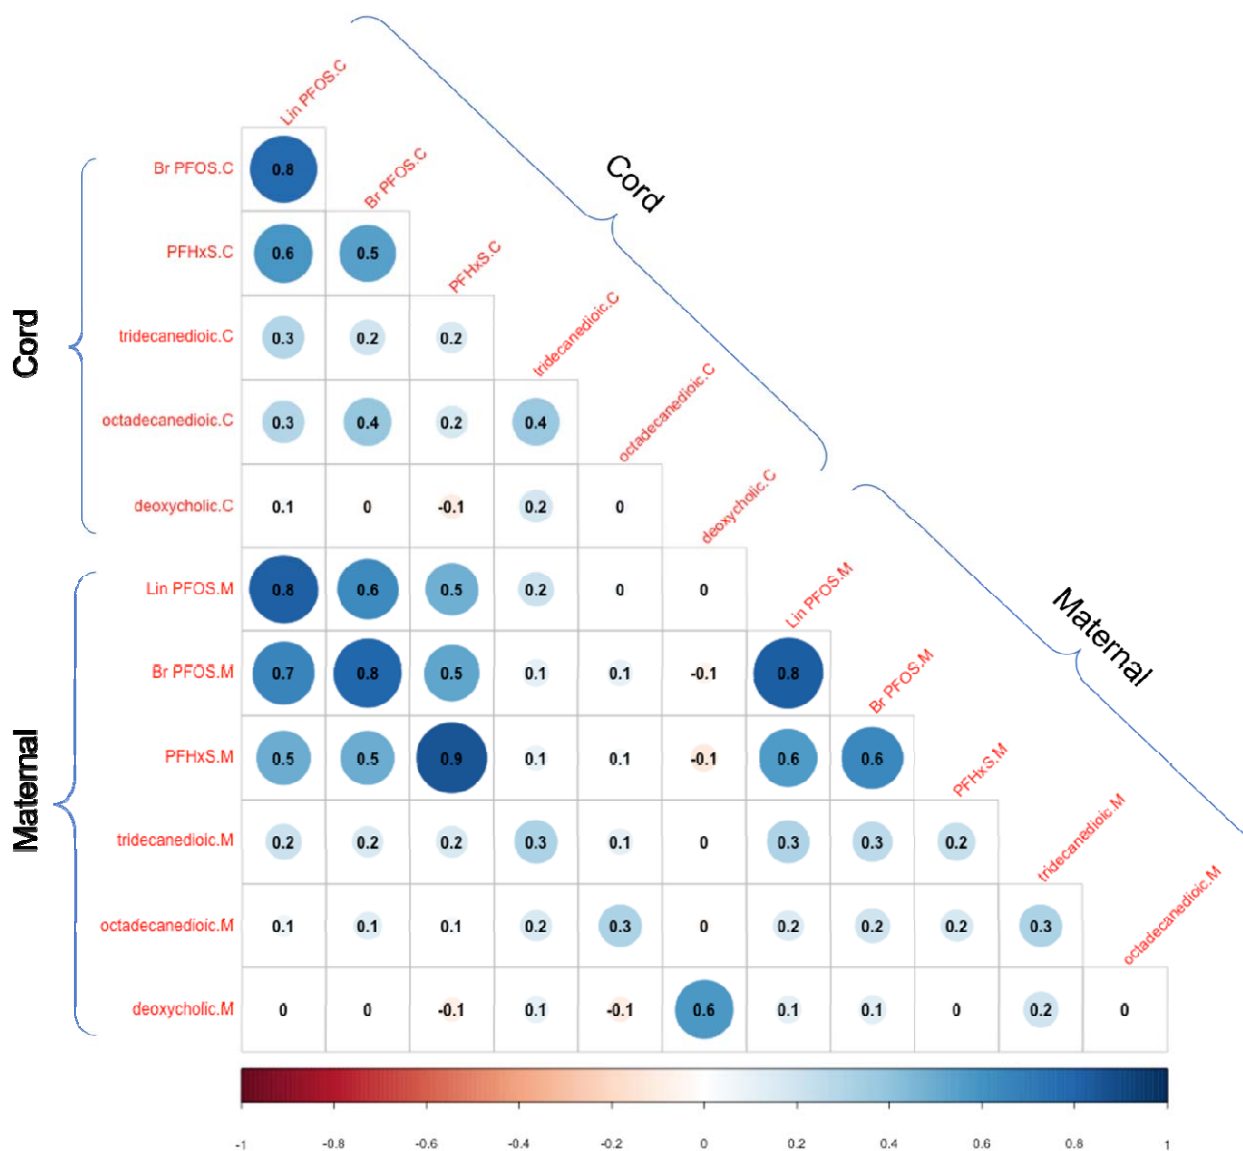

Figure 2: Spearman correlation coefficients for chemicals detected in maternal and cord samples, chemical have at least 65% DF in maternal and cord samples (n = 302).
